# Supplementary material
Source: Springer Nature journal article supplement (https://www.springermedizin.de/resource/supplementary/13033_2011_112_MOESM7_ESM.pdf/9651880)

# WAI Patient rates psychiatrist

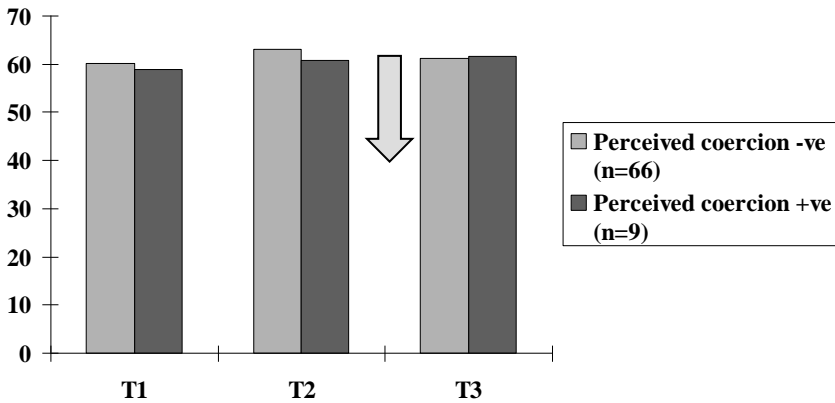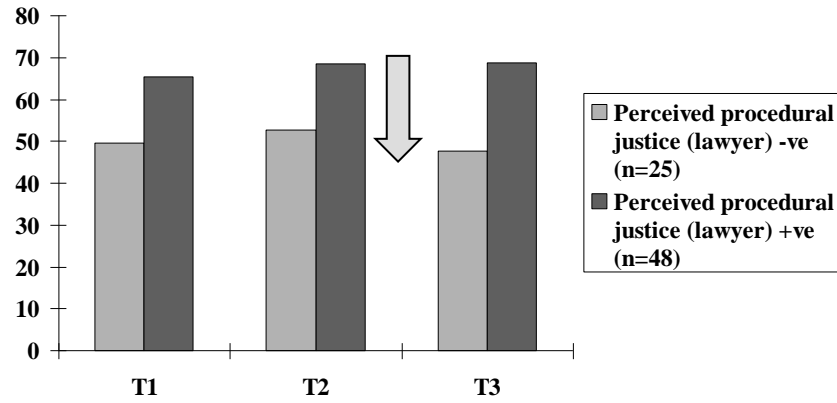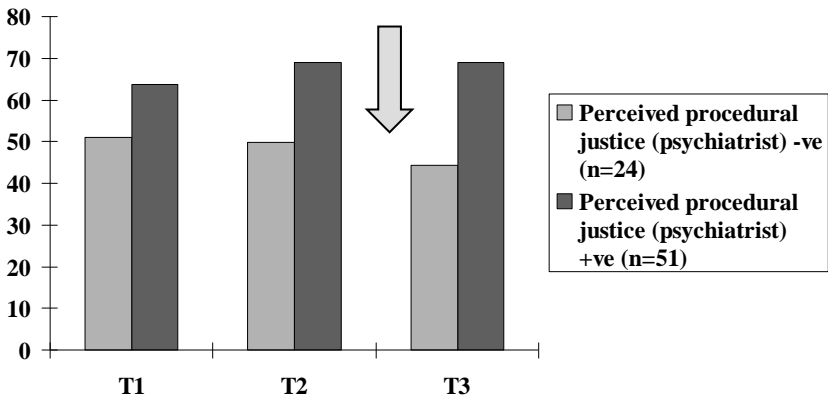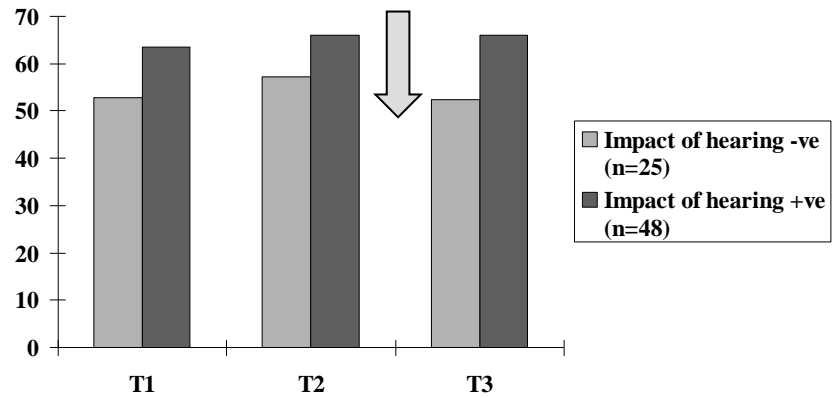

Supplement: MOESM7 [file 9651880]
